# Supplementary material
Source: ML conference proceedings conference paper supplement (https://openaccess.thecvf.com/content/cvpr_2016/html/Sharmanska_Learning_From_the_2016_CVPR_paper.html)
Supplement: Supplementary file 1 [file Sharmanska_Learning_From_the_2016_CVPR_supplemental.pdf]

# Supplementary Material – Learning from the Mistakes of Others: Matching Errors in Cross-Dataset Learning

Viktoriia Sharmanska and Novi Quadrianto  
SMiLe CLiNiC, University of Sussex, Brighton, UK  
sharmanska.v@gmail.com; n.quadrianto@sussex.ac.uk

## 1. Learning from the mistakes in 3D models

|                        | SVM<br>Images       | SVM<br>Combined     | SVM [2]<br>Adaptive | SVM (ours)<br>MMD   |
|------------------------|---------------------|---------------------|---------------------|---------------------|
| airplane v. backpack   | 98.87 ± 0.05        | 98.63 ± 0.05        | 98.18 ± 0.22        | <b>98.93 ± 0.03</b> |
| airplane v. bicycle    | 97.22 ± 0.14        | 97.20 ± 0.15        | 96.99 ± 0.22        | <b>97.44 ± 0.13</b> |
| airplane v. boat       | 92.97 ± 0.27        | 92.73 ± 0.25        | 93.06 ± 0.15        | <b>93.74 ± 0.16</b> |
| airplane v. car        | 95.62 ± 0.13        | 95.58 ± 0.11        | 95.40 ± 0.11        | <b>95.84 ± 0.10</b> |
| airplane v. chair      | 96.74 ± 0.15        | 96.80 ± 0.14        | <b>96.89 ± 0.10</b> | 96.72 ± 0.17        |
| airplane v. couch      | 98.24 ± 0.09        | 98.05 ± 0.09        | 97.73 ± 0.15        | <b>98.45 ± 0.07</b> |
| airplane v. helicopter | 81.86 ± 0.43        | 83.38 ± 0.34        | <b>83.53 ± 0.39</b> | 81.99 ± 0.46        |
| airplane v. laptop     | 98.64 ± 0.07        | 98.34 ± 0.07        | 98.15 ± 0.12        | <b>98.72 ± 0.06</b> |
| backpack v. bicycle    | 97.76 ± 0.05        | 97.67 ± 0.07        | 97.52 ± 0.11        | <b>97.86 ± 0.06</b> |
| backpack v. boat       | 98.22 ± 0.08        | 98.00 ± 0.07        | 97.64 ± 0.15        | <b>98.25 ± 0.07</b> |
| backpack v. car        | 97.33 ± 0.08        | 96.51 ± 0.10        | 96.31 ± 0.17        | <b>97.47 ± 0.07</b> |
| backpack v. chair      | <b>94.44 ± 0.24</b> | 93.92 ± 0.18        | 94.36 ± 0.14        | 94.26 ± 0.23        |
| backpack v. couch      | 95.94 ± 0.13        | 95.62 ± 0.14        | 95.53 ± 0.22        | <b>96.10 ± 0.10</b> |
| backpack v. helicopter | <b>98.72 ± 0.05</b> | 98.37 ± 0.07        | 98.26 ± 0.12        | 98.72 ± 0.03        |
| backpack v. laptop     | 96.51 ± 0.16        | 96.32 ± 0.10        | 96.28 ± 0.13        | <b>96.63 ± 0.11</b> |
| bicycle v. boat        | 96.64 ± 0.12        | 96.77 ± 0.11        | 96.74 ± 0.10        | <b>96.77 ± 0.10</b> |
| bicycle v. car         | 96.69 ± 0.13        | 96.68 ± 0.13        | 96.48 ± 0.10        | <b>97.06 ± 0.08</b> |
| bicycle v. chair       | 94.43 ± 0.14        | 94.64 ± 0.15        | <b>94.86 ± 0.14</b> | 94.72 ± 0.15        |
| bicycle v. couch       | 98.16 ± 0.11        | 98.09 ± 0.11        | 97.89 ± 0.14        | <b>98.42 ± 0.07</b> |
| bicycle v. helicopter  | 96.08 ± 0.15        | <b>96.19 ± 0.11</b> | 96.03 ± 0.18        | 96.11 ± 0.15        |
| bicycle v. laptop      | 98.30 ± 0.07        | 98.15 ± 0.07        | 97.95 ± 0.19        | <b>98.34 ± 0.05</b> |
| boat v. car            | 94.00 ± 0.12        | 94.07 ± 0.16        | 93.91 ± 0.17        | <b>94.27 ± 0.12</b> |
| boat v. chair          | 94.20 ± 0.15        | 94.31 ± 0.10        | <b>94.63 ± 0.10</b> | 94.48 ± 0.15        |
| boat v. couch          | 97.00 ± 0.10        | 96.89 ± 0.11        | 96.71 ± 0.14        | <b>97.16 ± 0.07</b> |
| boat v. helicopter     | 92.52 ± 0.26        | 91.87 ± 0.24        | 92.07 ± 0.32        | <b>92.66 ± 0.26</b> |
| boat v. laptop         | 98.05 ± 0.07        | 97.75 ± 0.12        | 97.80 ± 0.14        | <b>98.11 ± 0.06</b> |
| car v. chair           | 95.88 ± 0.12        | 95.73 ± 0.13        | 95.99 ± 0.11        | <b>96.03 ± 0.13</b> |
| car v. couch           | 97.07 ± 0.09        | 96.70 ± 0.10        | 96.56 ± 0.16        | <b>97.29 ± 0.08</b> |
| car v. helicopter      | 94.97 ± 0.16        | 95.12 ± 0.13        | 95.02 ± 0.16        | <b>95.15 ± 0.14</b> |
| car v. laptop          | 96.99 ± 0.08        | 96.92 ± 0.09        | 96.76 ± 0.11        | <b>97.20 ± 0.07</b> |
| chair v. couch         | 86.09 ± 0.31        | 85.63 ± 0.34        | 86.31 ± 0.31        | <b>86.45 ± 0.27</b> |
| chair v. helicopter    | 96.99 ± 0.18        | 97.17 ± 0.20        | <b>97.39 ± 0.16</b> | 96.81 ± 0.16        |
| chair v. laptop        | 93.64 ± 0.25        | 93.78 ± 0.20        | 93.86 ± 0.19        | <b>94.08 ± 0.20</b> |
| couch v. helicopter    | 98.65 ± 0.08        | 98.45 ± 0.07        | 98.33 ± 0.12        | <b>98.71 ± 0.05</b> |
| couch v. laptop        | <b>93.73 ± 0.19</b> | 93.60 ± 0.21        | 93.56 ± 0.28        | 93.69 ± 0.22        |
| helicopter v. laptop   | <b>98.80 ± 0.05</b> | 98.48 ± 0.07        | 98.41 ± 0.13        | 98.72 ± 0.05        |
| average accuracy       | 95.78               | 95.67               | 95.64               | <b>95.93</b>        |

Table 1. Learning image classifiers with the mistakes of 3D model classifiers. The best result is highlighted in **boldface** and an extra **blue** for our SVM MMD.

## 2. Learning from the mistakes in abstract images (instance-level setting)

|                       | SVM<br>Images       | SVM<br>Combined     | SVM [2]<br>Adaptive | SVM+ [1]            | SVM (ours)<br>MMD   |
|-----------------------|---------------------|---------------------|---------------------|---------------------|---------------------|
| carrying              | 96.79 ± 0.38        | 95.71 ± 0.55        | 96.57 ± 0.51        | <b>97.00 ± 0.48</b> | <b>97.00 ± 0.36</b> |
| catching              | 84.77 ± 0.94        | 82.16 ± 1.04        | 82.27 ± 0.96        | 85.80 ± 0.91        | <b>85.91 ± 1.10</b> |
| pushing               | 78.55 ± 1.49        | 77.98 ± 1.21        | 78.06 ± 1.32        | <b>79.27 ± 0.98</b> | 79.19 ± 1.17        |
| pulling               | <b>69.52 ± 1.16</b> | 65.73 ± 1.33        | 66.45 ± 1.39        | 67.58 ± 1.69        | 66.85 ± 1.62        |
| reaching for          | 65.08 ± 1.43        | 68.83 ± 0.95        | 65.50 ± 0.92        | 65.08 ± 1.43        | <b>68.92 ± 1.49</b> |
| jumping over          | 90.67 ± 0.92        | 91.25 ± 0.85        | <b>92.31 ± 0.72</b> | 90.29 ± 0.94        | 90.67 ± 1.02        |
| hitting               | 84.07 ± 0.88        | 82.50 ± 0.98        | 82.41 ± 0.95        | 83.98 ± 0.91        | <b>84.17 ± 0.88</b> |
| kicking               | 91.08 ± 0.66        | 90.92 ± 0.75        | 90.33 ± 0.93        | 91.25 ± 0.69        | <b>92.33 ± 0.68</b> |
| elbowing              | 85.91 ± 1.11        | 84.77 ± 1.31        | 85.45 ± 1.15        | 84.89 ± 1.28        | <b>86.02 ± 1.01</b> |
| tripping              | 85.53 ± 0.96        | 85.23 ± 1.05        | 85.83 ± 0.80        | 86.29 ± 0.92        | <b>86.74 ± 0.88</b> |
| waving at             | 68.04 ± 1.44        | <b>69.13 ± 1.62</b> | 68.48 ± 1.59        | 68.04 ± 1.54        | 68.15 ± 1.66        |
| pointing at           | 73.45 ± 1.63        | <b>77.24 ± 1.25</b> | 74.14 ± 1.64        | 73.71 ± 1.10        | 74.74 ± 1.06        |
| pointing away from    | 66.62 ± 1.62        | 65.00 ± 1.53        | 63.62 ± 1.86        | 65.88 ± 1.72        | <b>68.50 ± 1.97</b> |
| looking at            | 64.44 ± 1.32        | 65.48 ± 1.29        | 64.03 ± 1.05        | <b>66.69 ± 0.95</b> | 66.45 ± 1.05        |
| looking away from     | 69.22 ± 1.01        | 69.45 ± 1.17        | 68.52 ± 1.07        | 71.64 ± 1.13        | <b>73.05 ± 0.96</b> |
| laughing at           | 71.95 ± 1.14        | 71.56 ± 1.63        | 72.19 ± 1.37        | 73.05 ± 1.14        | <b>74.30 ± 0.95</b> |
| laughing with         | <b>81.77 ± 1.37</b> | 81.35 ± 1.42        | 80.94 ± 1.24        | 80.73 ± 1.21        | 79.38 ± 1.20        |
| hugging               | 87.19 ± 1.04        | <b>87.97 ± 0.95</b> | 87.27 ± 0.83        | 87.89 ± 1.12        | <b>87.97 ± 0.97</b> |
| wrestling with        | 90.68 ± 0.70        | 89.55 ± 0.65        | <b>91.02 ± 0.84</b> | 90.91 ± 0.70        | 90.45 ± 0.61        |
| dancing with          | 83.53 ± 0.75        | 83.46 ± 0.94        | 82.87 ± 1.05        | 83.53 ± 0.69        | <b>84.41 ± 0.60</b> |
| holding hand with     | 85.56 ± 0.98        | 86.37 ± 0.81        | 84.52 ± 0.90        | <b>86.69 ± 1.08</b> | 86.45 ± 0.80        |
| shaking hands with    | <b>96.72 ± 0.38</b> | 93.36 ± 0.77        | 94.74 ± 0.74        | 96.55 ± 0.37        | 96.55 ± 0.47        |
| talking with          | 80.00 ± 1.09        | 77.87 ± 0.87        | 78.68 ± 1.12        | 79.34 ± 1.21        | <b>81.91 ± 0.91</b> |
| arguing with          | 83.97 ± 1.00        | <b>85.09 ± 0.83</b> | 84.22 ± 0.98        | 84.74 ± 0.89        | 85.00 ± 0.75        |
| walking with          | 92.95 ± 0.77        | 92.05 ± 0.69        | 90.11 ± 1.22        | 93.30 ± 0.69        | <b>93.75 ± 0.75</b> |
| running with          | 90.75 ± 0.79        | 90.25 ± 0.70        | 88.92 ± 0.81        | <b>91.25 ± 0.88</b> | 91.08 ± 0.64        |
| crawling with         | 83.57 ± 1.54        | 83.69 ± 1.30        | 84.05 ± 1.46        | 82.50 ± 1.36        | <b>84.76 ± 1.51</b> |
| jumping with          | <b>82.88 ± 1.45</b> | 81.54 ± 1.48        | 81.54 ± 1.23        | 81.54 ± 1.58        | <b>82.88 ± 1.40</b> |
| walking to            | 80.09 ± 1.00        | 80.00 ± 1.33        | 77.77 ± 1.28        | 80.09 ± 1.17        | <b>81.52 ± 0.92</b> |
| running to            | 77.03 ± 1.00        | <b>78.12 ± 0.98</b> | 76.48 ± 1.17        | 77.66 ± 1.23        | 77.66 ± 1.03        |
| crawling to           | 80.80 ± 0.94        | 76.96 ± 1.18        | 77.68 ± 1.28        | <b>82.50 ± 0.85</b> | 82.41 ± 0.79        |
| jumping to            | 81.21 ± 0.92        | 81.03 ± 0.92        | 81.38 ± 0.95        | 81.38 ± 1.11        | <b>81.81 ± 1.04</b> |
| walking away from     | 77.18 ± 1.12        | 76.05 ± 1.35        | 74.19 ± 1.12        | <b>78.15 ± 1.10</b> | 77.98 ± 0.97        |
| running away from     | <b>85.89 ± 0.85</b> | 83.12 ± 1.55        | 82.68 ± 1.15        | 85.54 ± 0.75        | 85.71 ± 0.92        |
| crawling away from    | 77.61 ± 0.97        | 75.11 ± 1.52        | 75.68 ± 1.37        | 77.84 ± 1.12        | <b>80.11 ± 0.91</b> |
| jumping away from     | 83.91 ± 0.83        | 80.23 ± 1.02        | 82.34 ± 0.84        | 84.30 ± 0.87        | <b>85.23 ± 0.93</b> |
| walking after         | 84.20 ± 0.97        | 84.10 ± 0.98        | 82.80 ± 1.22        | 85.10 ± 1.00        | <b>86.50 ± 0.85</b> |
| running after         | 81.44 ± 1.07        | 82.12 ± 1.17        | 80.53 ± 1.05        | 82.35 ± 1.14        | <b>83.56 ± 0.81</b> |
| crawling after        | 85.24 ± 1.16        | 85.36 ± 1.23        | 84.88 ± 1.06        | <b>86.31 ± 1.14</b> | 85.12 ± 1.18        |
| jumping after         | 83.50 ± 0.79        | 84.58 ± 0.89        | 83.92 ± 0.73        | 84.17 ± 1.03        | <b>85.58 ± 0.68</b> |
| walking past          | 80.07 ± 0.89        | 76.91 ± 1.12        | 75.51 ± 1.06        | 80.00 ± 1.01        | <b>80.59 ± 1.05</b> |
| running past          | 74.22 ± 1.08        | 75.00 ± 1.01        | 74.61 ± 1.07        | 74.22 ± 1.05        | <b>75.62 ± 0.81</b> |
| crawling past         | 77.86 ± 1.35        | 77.50 ± 1.10        | 76.90 ± 1.36        | 77.74 ± 1.33        | <b>78.10 ± 0.95</b> |
| jumping past          | 77.96 ± 1.57        | 75.46 ± 1.61        | 76.67 ± 1.64        | 78.24 ± 1.57        | <b>78.61 ± 1.50</b> |
| standing next to      | 85.33 ± 0.96        | 85.11 ± 1.07        | 83.15 ± 1.06        | 84.24 ± 0.99        | <b>86.63 ± 1.03</b> |
| sitting next to       | 82.97 ± 1.04        | 82.50 ± 1.07        | 82.66 ± 1.02        | 83.59 ± 1.13        | <b>83.98 ± 1.07</b> |
| lying next to         | 70.43 ± 1.50        | <b>74.83 ± 0.99</b> | 71.64 ± 0.84        | 73.19 ± 1.16        | 74.66 ± 1.05        |
| crouching next to     | 79.22 ± 1.38        | 76.72 ± 1.52        | 75.62 ± 1.26        | 80.00 ± 1.05        | <b>80.62 ± 0.93</b> |
| standing in front of  | <b>71.43 ± 0.97</b> | 69.57 ± 1.11        | 69.86 ± 1.53        | 71.00 ± 1.17        | <b>71.43 ± 0.92</b> |
| sitting in front of   | 77.35 ± 0.98        | 77.20 ± 1.06        | 76.97 ± 0.94        | 78.41 ± 1.02        | <b>78.64 ± 1.08</b> |
| lying in front of     | 81.64 ± 0.97        | 80.26 ± 1.42        | 80.86 ± 1.07        | <b>82.07 ± 1.01</b> | 81.64 ± 1.10        |
| crouching in front of | 86.59 ± 0.96        | 79.55 ± 1.53        | 82.50 ± 1.29        | 86.36 ± 1.02        | <b>86.70 ± 1.16</b> |
| standing behind       | 70.86 ± 1.41        | 68.19 ± 1.44        | 69.74 ± 1.08        | 72.07 ± 1.38        | <b>72.33 ± 1.11</b> |
| sitting behind        | 88.63 ± 0.63        | 87.18 ± 0.68        | 86.45 ± 0.69        | 88.63 ± 0.50        | <b>88.87 ± 0.61</b> |
| lying behind          | 81.82 ± 0.97        | <b>83.33 ± 1.15</b> | 83.11 ± 0.91        | 82.80 ± 0.81        | <b>83.33 ± 1.10</b> |
| crouching behind      | 77.13 ± 0.73        | 75.46 ± 1.01        | 74.44 ± 1.18        | 77.13 ± 0.66        | <b>78.15 ± 0.61</b> |
| standing with         | 77.58 ± 1.15        | 79.60 ± 1.36        | 76.21 ± 1.28        | 78.55 ± 0.95        | <b>80.48 ± 1.24</b> |
| sitting with          | <b>81.07 ± 1.07</b> | 80.71 ± 1.43        | 77.98 ± 1.19        | 79.76 ± 1.10        | 80.36 ± 1.18        |
| lying with            | 69.67 ± 1.30        | 71.58 ± 1.35        | 69.83 ± 1.48        | <b>71.67 ± 1.33</b> | 71.42 ± 1.31        |
| crouching with        | 81.52 ± 1.16        | <b>82.72 ± 1.05</b> | 81.30 ± 1.02        | 81.30 ± 0.99        | 81.74 ± 1.17        |
| avg. acc.             | 80.61               | 80.03               | 79.52               | 80.93               | <b>81.58</b>        |

Table 2. Learning image classifiers with the mistakes of clip art classifiers (**instance-level setting**). In this setting of cross-dataset learning, we pair one clip art illustration with each training image as privileged information. The best result is highlighted in **boldface** with an extra **blue** for our SVM MMD.

## References

- [1] V. Vapnik and A. Vashist. A new learning paradigm: Learning using privileged information. *Neural Networks*, pages 544–557, 2009. [2](#)
- [2] J. Yang, R. Yan, and A. G. Hauptmann. Cross-domain video concept detection using adaptive SVMs. In *ACM MM*, 2007. [1](#), [2](#)
